# Supplementary material for: A novel upconversion, fluorescence resonance energy transfer biosensor (FRET) for sensitive detection of lead ions in human serum
Source: Royal Society of Chemistry journal article supplement (doi:10.1039/c4nr03092c), 2014-08-12
Supplement: c4nr03092c1.pdf [file c4nr03092c1.pdf]

### Supporting Information

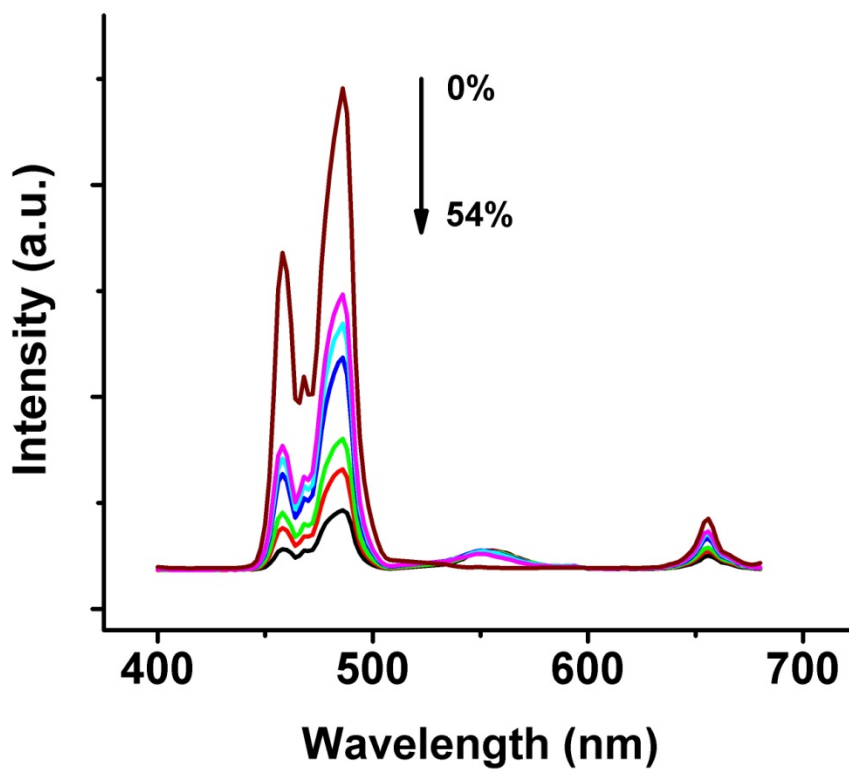

Figure S1 Origin FRET spectra with different concentrations of QDs of the mixture solution

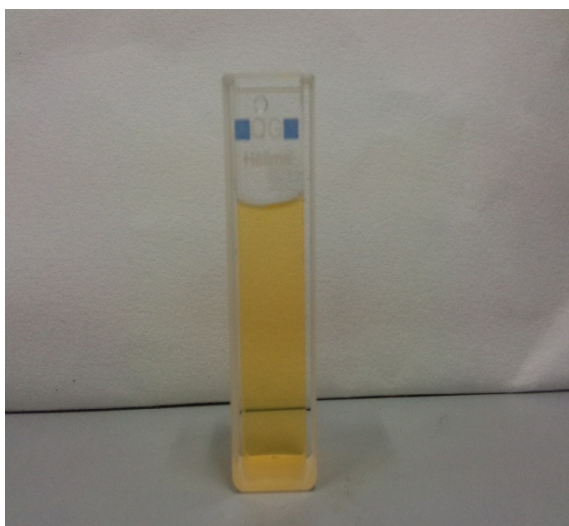

Figure S2 The photograph of the complex of UCNPs and QDs (The concentration of the QDs is 54%).

| Ions                     | Mg <sup>2+</sup> | Ca <sup>2+</sup> , | Fe <sup>2+</sup> | K <sup>+</sup> | Na <sup>+</sup> | Cl <sup>-</sup> | Zn <sup>2+</sup> | Cu <sup>2+</sup> | Ni <sup>2+</sup> , | Co <sup>2+</sup> |
|--------------------------|------------------|--------------------|------------------|----------------|-----------------|-----------------|------------------|------------------|--------------------|------------------|
| Selectivity coefficients | 0.058            | 0.096              | 0.024            | 0.026          | 0.035           | 0.035           | 0.039            | 0.091            | 0.151              | 0.159            |

Table S1 The selectivity coefficients of the interference ions.
